# Supplementary material
Source: PubMed Central journal article supplement (PMC2744072)
Supplement: NIHMS114766-supplement-Supplem_Table_2.pdf [file NIHMS114766-supplement-Supplem_Table_2.pdf]

**Supplementary Table 2.** Test for the presence of synergistic interactions.

Survival fractions of single and combination treatments, fold increase of cytotoxicity, and fractional product of cells at each condition, were analyzed as in Linda Duska et al, J Natl Cancer Instit, 91 (18): 157-63, 1999.

Raw data is expressed as mean survival fractions (s.f.) from PDT alone, MTX alone, or the combination.

Cytotoxic fractions (c.f.) were calculated as  $1 - \text{s.f.}$

To test Bliss synergism, calculate the fractional product value as:  $\text{c.f. [comb]} / \{\text{c.f. [PDT]} + \text{c.f. [MTX]} - (\text{c.f. [PDT]} \times \text{c.f. [MTX]})\}$

If this product > 1, then Bliss synergism

If this product = 1, then Bliss additivity

If this product < 1, then Bliss antagonism

| CELL TYPE | METHOTREX CONCENTR<br>mg / liter | n | SURVIVAL FRACTIONS (s.f.)    |       |              |       | CYTOTOXIC FRACTIONS (c.f.) |       |           | FRACTIONAL PRODUCT |           |              |
|-----------|----------------------------------|---|------------------------------|-------|--------------|-------|----------------------------|-------|-----------|--------------------|-----------|--------------|
|           |                                  |   | MTX alone<br>(at conc shown) |       | PDT alone    |       | PDT + MTX                  |       | MTX alone |                    | PDT alone | PDT + MTX    |
|           |                                  |   | MEAN                         | SD    | MEAN         | SD    | MEAN                       | SD    |           |                    |           |              |
| NHEK      | 0                                | 3 | <b>0.936</b>                 | 0.027 | <b>0.815</b> |       |                            | n/a   |           |                    |           |              |
| NHEK      | 0.001                            | 3 | <b>0.852</b>                 | 0.012 | <b>0.815</b> | 0.063 | <b>0.786</b>               | 0.028 | 0.148     | 0.185              | 0.214     | <b>0.700</b> |
| NHEK      | 0.01                             | 3 | <b>0.825</b>                 | 0.021 | <b>0.815</b> | 0.063 | <b>0.782</b>               | 0.026 | 0.175     | 0.185              | 0.218     | <b>0.664</b> |
| NHEK      | 0.1                              | 3 | <b>0.736</b>                 | 0.003 | <b>0.815</b> | 0.063 | <b>0.752</b>               | 0.027 | 0.264     | 0.185              | 0.248     | <b>0.620</b> |
| NHEK      | 1.0                              | 3 | <b>0.635</b>                 | 0.013 | <b>0.815</b> | 0.063 | <b>0.682</b>               | 0.021 | 0.365     | 0.185              | 0.318     | <b>0.659</b> |
| SCC13     | 0                                | 3 | <b>0.800</b>                 | 0.038 | <b>0.837</b> | 0.033 | n/a                        |       |           |                    |           |              |
| SCC13     | 0.001                            | 3 | <b>0.852</b>                 | 0.015 | <b>0.837</b> | 0.033 | <b>0.629</b>               | 0.109 | 0.148     | 0.163              | 0.371     | <b>1.293</b> |
| SCC13     | 0.01                             | 3 | <b>0.830</b>                 | 0.042 | <b>0.837</b> | 0.033 | <b>0.471</b>               | 0.017 | 0.170     | 0.163              | 0.529     | <b>1.733</b> |
| SCC13     | 0.1                              | 3 | <b>0.763</b>                 | 0.065 | <b>0.837</b> | 0.033 | <b>0.496</b>               | 0.078 | 0.237     | 0.163              | 0.504     | <b>1.395</b> |
| SCC13     | 1.0                              | 3 | <b>0.757</b>                 | 0.015 | <b>0.837</b> | 0.033 | <b>0.408</b>               | 0.080 | 0.243     | 0.163              | 0.592     | <b>1.616</b> |
| HEK1      | 0                                | 3 | <b>0.958</b>                 | 0.019 | <b>0.897</b> | 0.0   | n/a                        |       |           |                    |           |              |
| HEK1      | 0.001                            | 3 | <b>0.877</b>                 | 0.032 | <b>0.897</b> | 0.0   | <b>0.500</b>               | 0.117 | 0.123     | 0.103              | 0.500     | <b>2.344</b> |
| HEK1      | 0.01                             | 3 | <b>0.915</b>                 | 0.015 | <b>0.897</b> | 0.0   | <b>0.417</b>               | 0.059 | 0.085     | 0.103              | 0.583     | <b>3.253</b> |
| HEK1      | 0.1                              | 3 | <b>0.810</b>                 | 0.098 | <b>0.897</b> | 0.0   | <b>0.298</b>               | 0.038 | 0.190     | 0.103              | 0.702     | <b>2.567</b> |
| HEK1      | 1.0                              | 3 | <b>0.687</b>                 | 0.072 | <b>0.897</b> | 0.0   | <b>0.148</b>               | 0.030 | 0.313     | 0.103              | 0.852     | <b>2.220</b> |

Supplementary Table 2 (continued)

**Bliss synergy using fractional products** Method of Duska et al, JNCI, 91 (18): 157-63, 1999. (Paul C. Elson, Ph.D. 04/16/2008)

| Cell Line | MTX Dose                        | Using Formulas from Duska et al<br>(Synergy Defined as a Ratio) |                |                       | Synergy in a Linear Form <sup>6</sup> |                |                       |
|-----------|---------------------------------|-----------------------------------------------------------------|----------------|-----------------------|---------------------------------------|----------------|-----------------------|
|           |                                 | Synergy $\pm$ s.e. <sup>1,2</sup>                               | p <sup>3</sup> | Interpretation        | Synergy $\pm$ s.e. <sup>7</sup>       | p <sup>8</sup> | Interpretation        |
| NHEK      | 0.001 mg/L                      | <b>0.70</b> $\pm$ 0.09                                          | .08            | No synergy/antagonism | -0.09 $\pm$ 0.04                      | .12            | No synergy/antagonism |
|           | 0.01                            | <b>0.66</b> $\pm$ 0.08                                          | .05            | Antagonism            | -0.11 $\pm$ 0.03                      | .09            | No synergy/antagonism |
|           | 0.1                             | <b>0.62</b> $\pm$ 0.06                                          | .03            | Antagonism            | -0.15 $\pm$ 0.04                      | .05            | Antagonism            |
|           | 1.0                             | <b>0.66</b> $\pm$ 0.04                                          | .01            | Antagonism            | -0.16 $\pm$ 0.03                      | .03            | Antagonism            |
|           | All doses combined <sup>4</sup> | <b>0.66</b> $\pm$ 0.02                                          | <.001          | Antagonism            | -0.13 $\pm$ 0.02                      | .005           | Antagonism            |
| SCC13     | 0.001 mg/L                      | <b>1.30</b> $\pm$ 0.23                                          | .33            | No synergy/antagonism | 0.08 $\pm$ 0.07                       | .32            | No synergy/antagonism |
|           | 0.01                            | <b>1.73</b> $\pm$ 0.16                                          | .05            | Synergy               | 0.22 $\pm$ 0.03                       | .02            | Synergy               |
|           | 0.1                             | <b>1.40</b> $\pm$ 0.18                                          | .16            | No synergy/antagonism | 0.14 $\pm$ 0.06                       | .13            | No synergy/antagonism |
|           | 1.0                             | <b>1.62</b> $\pm$ 0.14                                          | .05            | Synergy               | 0.23 $\pm$ 0.05                       | .04            | Synergy               |
|           | All doses combined <sup>4</sup> | <b>1.51</b> $\pm$ 0.10                                          | .02            | Synergy               | 0.17 $\pm$ 0.03                       | .02            | Synergy               |
| HEK1      | 0.001 mg/L                      | <b>2.34</b> $\pm$ 0.37                                          | .07            | No synergy/antagonism | 0.29 $\pm$ 0.07                       | .05            | Synergy               |
|           | 0.01                            | <b>3.24</b> $\pm$ 0.25                                          | .01            | Synergy               | 0.40 $\pm$ 0.04                       | .008           | Synergy               |
|           | 0.1                             | <b>2.56</b> $\pm$ 0.48                                          | .08            | No synergy/antagonism | 0.43 $\pm$ 0.06                       | .02            | Synergy               |
|           | 1.0                             | <b>2.22</b> $\pm$ 0.22                                          | .03            | Synergy               | 0.47 $\pm$ 0.04                       | .008           | Synergy               |
|           | All doses combined <sup>4</sup> | <b>2.59</b> $\pm$ 0.23                                          | .006           | Synergy               | 0.40 $\pm$ 0.04                       | .002           | Synergy               |

<sup>1</sup> Let a = mean cytotoxic fraction from PDT alone; b= mean cytotoxic fraction from MTX alone; c = mean cytotoxic fraction from the combination  
The calculation for Bliss synergy (Duska et al) is:  $c/[ (a+b) - (ab) ]$ . Values >1 indicate synergy; <1 implies antagonism; equality with 1 indicates independence

<sup>2</sup> Standard errors were estimated using a first order Taylor series expansion about the variance of  $c/[ (a+b) - (ab) ]$

<sup>3</sup> p-values are from 2-sided, one-sample t-tests of  $H_0$ : Bliss synergy=1

<sup>4</sup> Counts synergy of each dose as one "observation"

<sup>6</sup>  $c-[ (a+b) - (ab) ]$ ; values>0 indicate synergy; <0 implies antagonism; equality with 0 indicates independence

<sup>7</sup> Estimated variance using first order Taylor series

<sup>8</sup> p-values are from 2-sided, one-sample t-tests of  $H_0$ : Bliss synergy=0
